# Supplementary material for: Understanding the role of sex on outcomes for the cancer patient undergoing treatment with immune checkpoint inhibitors: a scoping review protocol
Source: HighWire-hosted journal article supplement (doi:10.1136/bmjopen-2021-059782), 2022-07-01
Supplement: bmjopen-2021-059782supp002_data_supplement.pdf [file bmjopen-2021-059782supp002_data_supplement.pdf]

**Extraction/Charting Form**

| Author(s)* | Study type | Population | ICI 1 | ICI 2 | Mono/<br>Combo | Objective/<br>Outcomes | Summary |
|------------|------------|------------|-------|-------|----------------|------------------------|---------|
|            |            |            |       |       |                |                        |         |
|            |            |            |       |       |                |                        |         |
|            |            |            |       |       |                |                        |         |

\* Include year, title, etc.
